# Supplementary material
Source: PubMed Central journal article supplement (PMC3472367)
Supplement: NIHMS405157-supplement-Supp_Data.pdf [file NIHMS405157-supplement-Supp_Data.pdf]

**Supplemental Table 1. PCR array analysis of LPS-inducible genes (C+/C- > 8.0) in RAW264.7 macrophages**

| Rank | Symbol <sup>*</sup> | GenBank   | C- <sup>†</sup> | P- <sup>†</sup> | C+ <sup>†</sup> | P+ <sup>†</sup> | C+/C- <sup>†</sup> | PV <sup>†</sup> , |
|------|---------------------|-----------|-----------------|-----------------|-----------------|-----------------|--------------------|-------------------|
| 1    | IFN- $\gamma$       | NM_008337 | 1.0             | 2.4E+01         | 4.0E+01         | 8.8E+05         | 4.0E+01            | 2.2E+04           |
| 2    | Ccr4                | NM_009916 | 1.0             | 1.9E+01         | 2.7E+01         | 4.1E+02         | 2.7E+01            | 1.5E+01           |
| 3    | Ccl1                | NM_011329 | 1.0             | 2.4E+01         | 8.1E+00         | 1.2E+02         | 8.1E+00            | 1.5E+01           |
| 4    | Ccl20               | NM_016960 | 1.0             | 4.8E-01         | 3.0E+01         | 1.3E+02         | 3.0E+01            | 4.4E+00           |
| 5    | IL-10               | NM_010548 | 1.0             | 2.1E+00         | 2.0E+01         | 4.3E+01         | 2.0E+01            | 2.1E+00           |
| 6    | Ccl19               | NM_011888 | 1.0             | 7.9E+00         | 8.3E+00         | 1.5E+01         | 8.3E+00            | 1.9E+00           |
| 7    | Ccr9                | NM_009913 | 1.0             | 6.9E-01         | 6.4E+02         | 8.2E+02         | 6.4E+02            | 1.3E+00           |
| 8    | IL-1a               | NM_010554 | 1.0             | 7.7E-01         | 8.3E+02         | 8.9E+02         | 8.3E+02            | 1.1E+00           |
| 9    | TNF                 | NM_013693 | 1.0             | 1.3E+00         | 4.4E+01         | 4.3E+01         | 4.4E+01            | 9.9E-01           |
| 10   | Ccl4                | NM_013652 | 1.0             | 1.1E+00         | 1.5E+01         | 1.5E+01         | 1.5E+01            | 9.9E-01           |
| 11   | IL-1b               | NM_008361 | 1.0             | 1.7E+00         | 3.1E+03         | 3.1E+03         | 3.1E+03            | 9.9E-01           |
| 12   | IL1f6               | NM_019450 | 1.0             | 2.1E+00         | 1.1E+02         | 9.8E+01         | 1.1E+02            | 9.2E-01           |
| 13   | Ccl17               | NM_011332 | 1.0             | 7.3E-04         | 1.3E+02         | 1.2E+02         | 1.3E+02            | 9.1E-01           |
| 14   | Ccr7                | NM_007719 | 1.0             | 1.2E+01         | 7.3E+02         | 6.5E+02         | 7.3E+02            | 8.9E-01           |
| 15   | Lta                 | NM_010735 | 1.0             | 1.3E-01         | 1.6E+01         | 1.4E+01         | 1.6E+01            | 8.6E-01           |
| 16   | Ccl3                | NM_011337 | 1.0             | 1.2E+00         | 2.7E+01         | 2.2E+01         | 2.7E+01            | 8.3E-01           |
| 17   | Ccl5                | NM_013653 | 1.0             | 6.2E-01         | 2.8E+01         | 2.3E+01         | 2.8E+01            | 8.2E-01           |
| 18   | Tnfrsf1b            | NM_011610 | 1.0             | 9.5E-01         | 1.6E+01         | 1.3E+01         | 1.6E+01            | 8.1E-01           |
| 19   | IL-5Ra              | NM_008370 | 1.0             | 2.1E+05         | 4.9E+05         | 1.9E+05         | 4.9E+05            | 8.1E-01           |
| 20   | Ccl22               | NM_009137 | 1.0             | 5.7E-01         | 1.1E+02         | 8.1E+01         | 1.1E+02            | 7.7E-01           |
| 21   | Cxcl10              | NM_021274 | 1.0             | 9.4E-01         | 7.6E+01         | 5.8E+01         | 7.6E+01            | 7.5E-01           |
| 22   | Ccl7                | NM_013654 | 1.0             | 1.2E+00         | 2.6E+10         | 1.9E+10         | 2.6E+10            | 7.5E-01           |
| 23   | Cxcl11              | NM_019494 | 1.0             | 8.7E-01         | 2.5E+01         | 1.8E+01         | 2.5E+01            | 7.0E-01           |
| 24   | Ccl12               | NM_011331 | 1.0             | 2.8E+04         | 5.6E+06         | 3.5E+06         | 5.6E+06            | 6.3E-01           |
| 25   | Ccl9                | NM_011338 | 1.0             | 6.6E-01         | 8.9E+00         | 5.5E+00         | 8.9E+00            | 6.2E-01           |
| 26   | Ccl2                | NM_011333 | 1.0             | 4.6E-01         | 1.1E+03         | 6.5E+02         | 1.1E+03            | 6.1E-01           |
| 27   | IL-3                | NM_010556 | 1.0             | 4.7E+01         | 7.7E+01         | 3.3E+01         | 7.7E+01            | 4.3E-01           |
| 28   | Ccr6                | NM_009835 | 1.0             | 1.1E+03         | 6.8E+02         | 2.8E+01         | 6.8E+02            | 4.2E-02           |
| 29   | IL-1f8              | XM_130058 | 1.0             | 4.1E+03         | 2.2E+03         | 5.0E-01         | 2.2E+03            | 2.3E-04           |
| 30   | Cxcl15              | NM_011339 | 1.0             | 1.6E+12         | 3.6E+12         | 7.9E+04         | 3.6E+12            | 2.2E-08           |

\* IFN, interferone; Ccr, CC chemokine receptor; Ccl, CC chemokine ligand; IL, interleukin; TNF, tumor necrosis factor; LTA, lymphotoxin A; Tnfrsf1b, tumor necrosis factor receptor superfamily, member 1b; Cxcl, chemokine (C-X-C motif) ligand

<sup>†</sup> C-, control siRNA-transfected cells; P-, Pdcd4 siRNA-transfected cells; C+, control siRNA-transfected cells; P+, Pdcd4 siRNA-transfected cells; PV, Pdcd4-dependent value = P+/C+.
